# Supplementary material for: Using the Software DeepWings© to Classify Honey Bees across Europe through Wing Geometric Morphometrics
Source: MDPI journal article supplement (doi:10.3390/insects13121132), 2022-12-08
Supplement: s1 [file s1]

**Table S1.** Sampling locations, number of analyzed wings and colonies, and number of loci per molecular marker. Locations highlighted in bold indicate samples originating from conservation programs.

| Country               | Region                                                       | Number of wings | Number of colonies | Number of loci/number of colonies   |
|-----------------------|--------------------------------------------------------------|-----------------|--------------------|-------------------------------------|
| Portugal (continent)  | North-south Atlantic transect <sup>1</sup>                   | 690             | 138                | 383 SNPs <sup>2</sup> /138          |
| Spain                 | North-South Central and Mediterranean transects <sup>1</sup> | 2552            | 513                | 383 SNPs <sup>2</sup> /508          |
| Portugal (Azores)     | Faial <sup>3</sup>                                           | 299             | 60                 | 73 SNPs <sup>4</sup> /448           |
|                       | Flores <sup>3</sup>                                          | 240             | 48                 |                                     |
|                       | Graciosa <sup>3</sup>                                        | 95              | 19                 |                                     |
|                       | Pico <sup>3</sup>                                            | 366             | 74                 |                                     |
|                       | Santa Maria <sup>3</sup>                                     | 247             | 50                 |                                     |
|                       | São Jorge <sup>3</sup>                                       | 107             | 26                 |                                     |
|                       | São Miguel <sup>3</sup>                                      | 529             | 106                |                                     |
|                       | Terceira <sup>3</sup>                                        | 386             | 78                 |                                     |
| Belgium               | <b>Limburg (Bosland)</b>                                     | 77              | 2                  |                                     |
| France                | Avignon                                                      | 192             | 19                 | 91 SNPs <sup>5</sup> /19            |
|                       | <b>Groix</b>                                                 | 36              | 36*                | 13 microsatellites <sup>6</sup> /36 |
|                       | <b>Ouessant</b>                                              | 110             | 11                 | 91 SNPs <sup>5</sup> /11            |
| Ireland               | Free living colonies across the country                      | 494             | 50                 | 12 microsatellites <sup>7</sup> /29 |
| Poland                | Collected from flowers across the country                    | 899             | 899**              |                                     |
| Russia                |                                                              | 1377            | 52                 | 9 microsatellites <sup>8</sup> /8   |
| <b>Sweden</b>         |                                                              | 549             | 19                 |                                     |
| Switzerland           |                                                              | 355             | 9                  |                                     |
| UK                    | Wales                                                        | 170             | 17                 | 107 SNPs/17                         |
| Croatia <sup>9</sup>  |                                                              | 3048            | 159                |                                     |
| Hungary               | Partially collected from flowers across the country          | 207             | 95**               |                                     |
| Moldova               |                                                              | 108             | 10                 |                                     |
| Romania <sup>10</sup> |                                                              | 1266            | 90                 |                                     |
| Slovenia              |                                                              | 417             | 21                 |                                     |
| Total                 |                                                              | 14816           | 2601               |                                     |

Sampling locations and/or molecular classification in: <sup>1</sup>Chávez-Galarza (2013), <sup>2</sup>Chavez-Galarza (2015), <sup>3</sup>Ferreira (2020), <sup>4</sup>Henriques (manuscript in preparation), <sup>5</sup>Henriques (2021), <sup>6</sup>Garnery (2018), <sup>7</sup>Browne (2020), <sup>8</sup>Ilyasov (2020), <sup>9</sup>Puškadija (2020), <sup>10</sup>Tofilski (2021)

\*Each colony was represented by a single wing.

\*\*Samples were collected from flowers at least three kilometers apart, so they can be considered representative of individual colonies. Each colony is represented by a single forewing.

**Table S2.** Number (N) and probability (median, IQR) of wings classified into each subspecies per dataset.

| Country                 | Region         | Subspecies                  |                            |                            |                          |                            |
|-------------------------|----------------|-----------------------------|----------------------------|----------------------------|--------------------------|----------------------------|
|                         |                | <i>A. m.<br/>iberiensis</i> | <i>A. m.<br/>mellifera</i> | <i>A. m.<br/>ligustica</i> | <i>A. m.<br/>carnica</i> | <i>A. m.<br/>caucasica</i> |
| Portugal<br>(continent) |                | N                           | 567                        | 62                         | 20                       | 17                         |
|                         |                | Median<br>, IQR             | 0.925,<br>0.233            | 0.998, 0.009               | 0.717, 0.421             | 64.32, 0.310               |
| Spain                   |                | N                           | 1975                       | 394                        | 46                       | 49                         |
|                         |                | Median<br>, IQR             | 0.928,<br>0.251            | 0.999, 0.016               | 0.593, 0.486             | 0.731, 0.430               |
| Portugal<br>(Azores)    | Faial          | N                           | 214                        | 9                          | 37                       | 23                         |
|                         |                | Median<br>, IQR             | 0.910,<br>0.247            | 0.869, 0.276               | 0.737, 0.306             | 0.731, 0.325               |
|                         | Flores         | N                           | 175                        | 12                         | 19                       | 18                         |
|                         |                | Median<br>, IQR             | 0.876,<br>0.319            | 0.923, 0.157               | 0.822, 0.291             | 0.899, 0.163               |
|                         | Graciosa       | N                           | 24                         | 5                          | 48                       | 17                         |
|                         |                | Median<br>, IQR             | 0.716,<br>0.247            | 0.984, 0.026               | 0.935, 0.246             | 0.803, 0.320               |
|                         | Pico           | N                           | 238                        | 19                         | 45                       | 41                         |
|                         |                | Median<br>, IQR             | 0.884,<br>0.280            | 0.989, 0.233               | 0.768, 0.316             | 0.776, 0.356               |
|                         | Santa<br>Maria | N                           | 210                        | 6                          | 1                        | 1                          |
|                         |                | Median<br>, IQR             | 0.887,<br>0.262            | 0.999, 0.122               | 0.605                    | 0.697                      |
|                         | São<br>Jorge   | N                           | 77                         | 1                          | 13                       | 10                         |
|                         |                | Median<br>, IQR             | 0.920,<br>0.261            | 0.938                      | 0.895, 0.220             | 0.798, 0.271               |
|                         | São<br>Miguel  | N                           | 454                        | 10                         | 28                       | 8                          |
|                         |                | Median<br>, IQR             | 0.894,<br>0.243            | 0.995, 0.076               | 0.740, 0.324             | 0.800, 0.460               |
|                         | Terceira       | N                           | 231                        | 9                          | 111                      | 21                         |
|                         |                | Median<br>, IQR             | 0.818,<br>0.286            | 0.963, 0.107               | 0.827, 0.356             | 0.777, 0.347               |
| Belgium                 |                | N                           | 11                         | 62                         |                          | 1                          |
|                         |                | Median<br>, IQR             | 0.964,<br>0.278            | 1.000, 0.002               |                          | 0.994                      |
| France                  | Avignon        | N                           | 20                         | 30                         | 42                       | 38                         |
|                         |                | Median<br>, IQR             | 0.828,<br>0.322            | 0.975, 0.378               | 0.901, 0.235             | 0.954, 0.306               |
|                         | Groix          | N                           | 11                         | 23                         | 2                        |                            |
|                         |                | Median<br>, IQR             | 0.979,<br>0.196            | 0.996, 0.088               | 0.643, 0.096             |                            |
|                         | Ouessan<br>t   | N                           | 13                         | 47                         |                          | 4                          |
|                         |                | Median<br>, IQR             | 0.972,<br>0.351            | 1.000, 0.010               |                          | 0.896, 0.406               |
| Ireland                 |                | N                           | 73                         | 316                        | 9                        | 3                          |
|                         |                | Median<br>, IQR             | 0.975,<br>0.108            | 1.000, 0.002               | 1.000, 0.195             | 1.000, 0.004               |
| Poland                  |                | N                           | 24                         | 261                        | 112                      | 353                        |
|                         |                | Median<br>, IQR             | 0.638,<br>0.441            | 0.975, 0.169               | 0.855, 0.309             | 0.983, 0.148               |

|             |       |                 |                 |              |               |              |              |
|-------------|-------|-----------------|-----------------|--------------|---------------|--------------|--------------|
| Russia      |       | N               | 96              | 1214         | 9             | 9            | 14           |
|             |       | Median<br>, IQR | 0.843,<br>0.314 | 1.000, 0.005 | 0.798, 0.190  | 0.978, 0.419 | 0.791, 0.450 |
| Sweden      |       | N               | 92              | 414          | 10            |              |              |
|             |       | Median<br>, IQR | 0.941,<br>0.285 | 1.000, 0.004 | 1.000, 0.433  |              |              |
| Switzerland |       | N               | 72              | 158          | 53            | 18           | 27           |
|             |       | Median<br>, IQR | 0.910,<br>0.269 | 0.995, 0.044 | 0.932, 0.259  | 0.792, 0.452 | 0.760, 0.335 |
| UK          | Wales | N               | 20              | 48           | 12            | 15           | 33           |
|             |       | Median<br>, IQR | 0.609,<br>0.522 | 0.965, 0.167 | 0.755, 0.375  | 0.798, 0.421 | 0.792, 0.344 |
| Croatia     |       | N               | 35              | 107          | 590           | 2142         | 33           |
|             |       | Median<br>, IQR | 0.645,<br>0.341 | 0.860, 0.349 | 0.856, 0.303  | 0.991, 0.085 | 0.639, 0.314 |
| Hungary     |       | N               | 4               | 11           | 26            | 151          |              |
|             |       | Median<br>, IQR | 0.866,<br>0.167 | 0.764, 0.234 | 0.830, 0.378  | 0.996, 0.056 |              |
| Moldova     |       | N               | 11              | 10           | 28            | 36           | 18           |
|             |       | Median<br>, IQR | 0.547,<br>0.376 | 0.711, 0.273 | 0.859, 0.286  | 0.972, 0.171 | 0.725, 0.333 |
| Romania     |       | N               | 23              | 69           | 238           | 782          | 33           |
|             |       | Median<br>, IQR | 0.800,<br>0.397 | 0.793, 0.346 | 0.873, 0.276  | 0.990, 0.099 | 0.697, 0.343 |
| Slovenia    |       | N               | 3               | 16           | 65            | 297          | 3            |
|             |       | Median<br>, IQR | 0.868,<br>0.648 | 0.711, 0.423 | 0.808, 0.353  | 0.995, 0.060 | 0.578, 0.189 |
| Total       |       | N               | 4673            | 3313         | 1564          | 4054         | 356          |
|             |       | Median<br>, IQR | 0.908,<br>0.265 | 0.999, 0.023 | 0.0847, 0.309 | 0.988, 0.111 | 0.702, 0.339 |

**Table S3.** Number (N) and probability (media, IQR) of colonies classified into each subspecies per dataset.

| Country              | Region      | Subspecies              |                        |                        |                      |                       |
|----------------------|-------------|-------------------------|------------------------|------------------------|----------------------|-----------------------|
|                      |             | <i>A. m. iberiensis</i> | <i>A. m. mellifera</i> | <i>A. m. ligustica</i> | <i>A. m. carnica</i> | <i>A. m. caucasia</i> |
| Portugal (continent) | N           | 132                     | 4                      | 2                      |                      |                       |
|                      | Median, IQR | 0.935, 0.210            | 0.976, 0.141           | 0.550, 0.232           |                      |                       |
| Spain                | N           | 471                     | 38                     | 1                      | 1                    | 2                     |
|                      | Median, IQR | 0.918, 0.226            | 0.998, 0.005           | 0.764                  | 0.994                | 0.520, 0.172          |
| Portugal (Azores)    | Faial       | N                       | 57                     | 1                      | 2                    |                       |
|                      |             | Median, IQR             | 0.924, 0.243           | 0.922                  | 0.716, 0.564         |                       |
|                      | Flores      | N                       | 44                     | 1                      | 2                    | 1                     |
|                      |             | Median, IQR             | 0.806, 0.313           | 0.681                  | 0.638, 0.086         | 0.886                 |
|                      | Graciosa    | N                       | 4                      |                        | 14                   | 1                     |
|                      |             | Median, IQR             | 0.740, 0.388           |                        | 0.801, 0.349         | 0.525                 |
|                      | Pico        | N                       | 67                     |                        | 4                    | 2                     |
|                      |             | Median, IQR             | 0.881, 0.260           |                        | 0.637, 0.280         | 0.718, 0.315          |
|                      | Santa Maria | N                       | 49                     |                        |                      | 1                     |
|                      |             | Median, IQR             | 0.769, 0.318           |                        |                      | 0.551                 |
|                      | São Jorge   | N                       | 23                     |                        | 1                    | 2                     |
|                      |             | Median, IQR             | 0.953, 0.210           |                        | 0.927                | 0.608, 0.598          |
|                      | São Miguel  | N                       | 101                    | 1                      |                      | 2                     |
|                      |             | Median, IQR             | 0.812, 0.336           | 0.994                  |                      | 0.869, 0.222          |
|                      | Terceira    | N                       | 50                     |                        | 26                   | 2                     |
|                      |             | Median, IQR             | 0.695, 0.311           |                        | 0.679, 0.288         | 0.538, 0.153          |
| Belgium              | N           |                         | 2                      |                        |                      |                       |
|                      | Median, IQR |                         | 1.000, 0.000           |                        |                      |                       |
| France               | Avignon     | N                       | 4                      | 3                      | 6                    | 5                     |
|                      |             | Median, IQR             | 0.747, 0.374           | 0.990, 0.289           | 0.864, 0.388         | 0.992, 0.388          |
|                      | Groix       | N                       | 11                     | 23                     | 2                    |                       |
|                      |             | Median, IQR             | 0.988, 0.196           | 0.996, 0.088           | 0.643, 0.096         |                       |
|                      | Ouessant    | N                       | 2                      | 8                      |                      | 1                     |
|                      |             | Median, IQR             | 0.992, 0.016           | 0.998, 0.032           |                      | 97.99                 |
| Ireland              | N           | 7                       | 39                     | 2                      | 2                    |                       |
|                      |             |                         |                        |                        |                      |                       |

|             |  |                 |                 |              |               |              |              |
|-------------|--|-----------------|-----------------|--------------|---------------|--------------|--------------|
|             |  | Median<br>, IQR | 0.859,<br>0.279 | 1.000, 0.002 | 1.000, 0.001  | 0.997, 0.005 |              |
| Poland      |  | N               | 24              | 261          | 112           | 353          | 43           |
|             |  | Median<br>, IQR | 0.637,<br>0.255 | 0.975, 0.167 | 0.855, 0.268  | 0.983, 0.148 | 0.641, 0.316 |
| Russia      |  | N               | 1               | 50           | 1             |              |              |
|             |  | Median<br>, IQR | 0.571           | 0.998, 0.002 | 0.537         |              |              |
| Sweden      |  | N               | 3               | 16           |               |              |              |
|             |  | Median<br>, IQR | 0.850,<br>0.436 | 0.999, 0.016 |               |              |              |
| Switzerland |  | N               | 3               | 5            | 1             |              |              |
|             |  | Median<br>, IQR | 0.924,<br>0.126 | 0.992, 0.018 | 0.718         |              |              |
| UK<br>Wales |  | N               | 3               | 7            | 2             | 1            | 4            |
|             |  | Median<br>, IQR | 0.816,<br>0.462 | 0.758, 0.337 | 0.756, 0.2787 | 0.994        | 0.770, 0.189 |
| Croatia     |  | N               |                 | 1            | 14            | 144          |              |
|             |  | Median<br>, IQR |                 | 0.704, 0.000 | 0.664, 0.248  | 0.983, 0.058 |              |
| Hungary     |  | N               |                 | 5            | 9             | 74           |              |
|             |  | Median<br>, IQR |                 | 0.790, 0.240 | 0.922, 0.122  | 0.982, 0.121 |              |
| Moldova     |  | N               |                 |              | 3             | 5            | 2            |
|             |  | Median<br>, IQR |                 |              | 0.787, 0.341  | 0.695, 0.471 | 0.600, 0.096 |
| Romania     |  | N               |                 | 1            | 7             | 82           |              |
|             |  | Median<br>, IQR |                 | 0.624, 0.000 | 0.815, 0.252  | 0.989, 0.117 |              |
| Slovenia    |  | N               |                 |              | 1             | 20           |              |
|             |  | Median<br>, IQR |                 |              | 0.752, 0.000  | 0.993, 0.040 |              |
| Total       |  | N               | 1056            | 466          | 212           | 698          | 56           |
|             |  | Median<br>, IQR | 0.887,<br>0.275 | 0.994, 0.075 | 0.800, 0.290  | 0.983, 0.119 | 0.636, 0.334 |

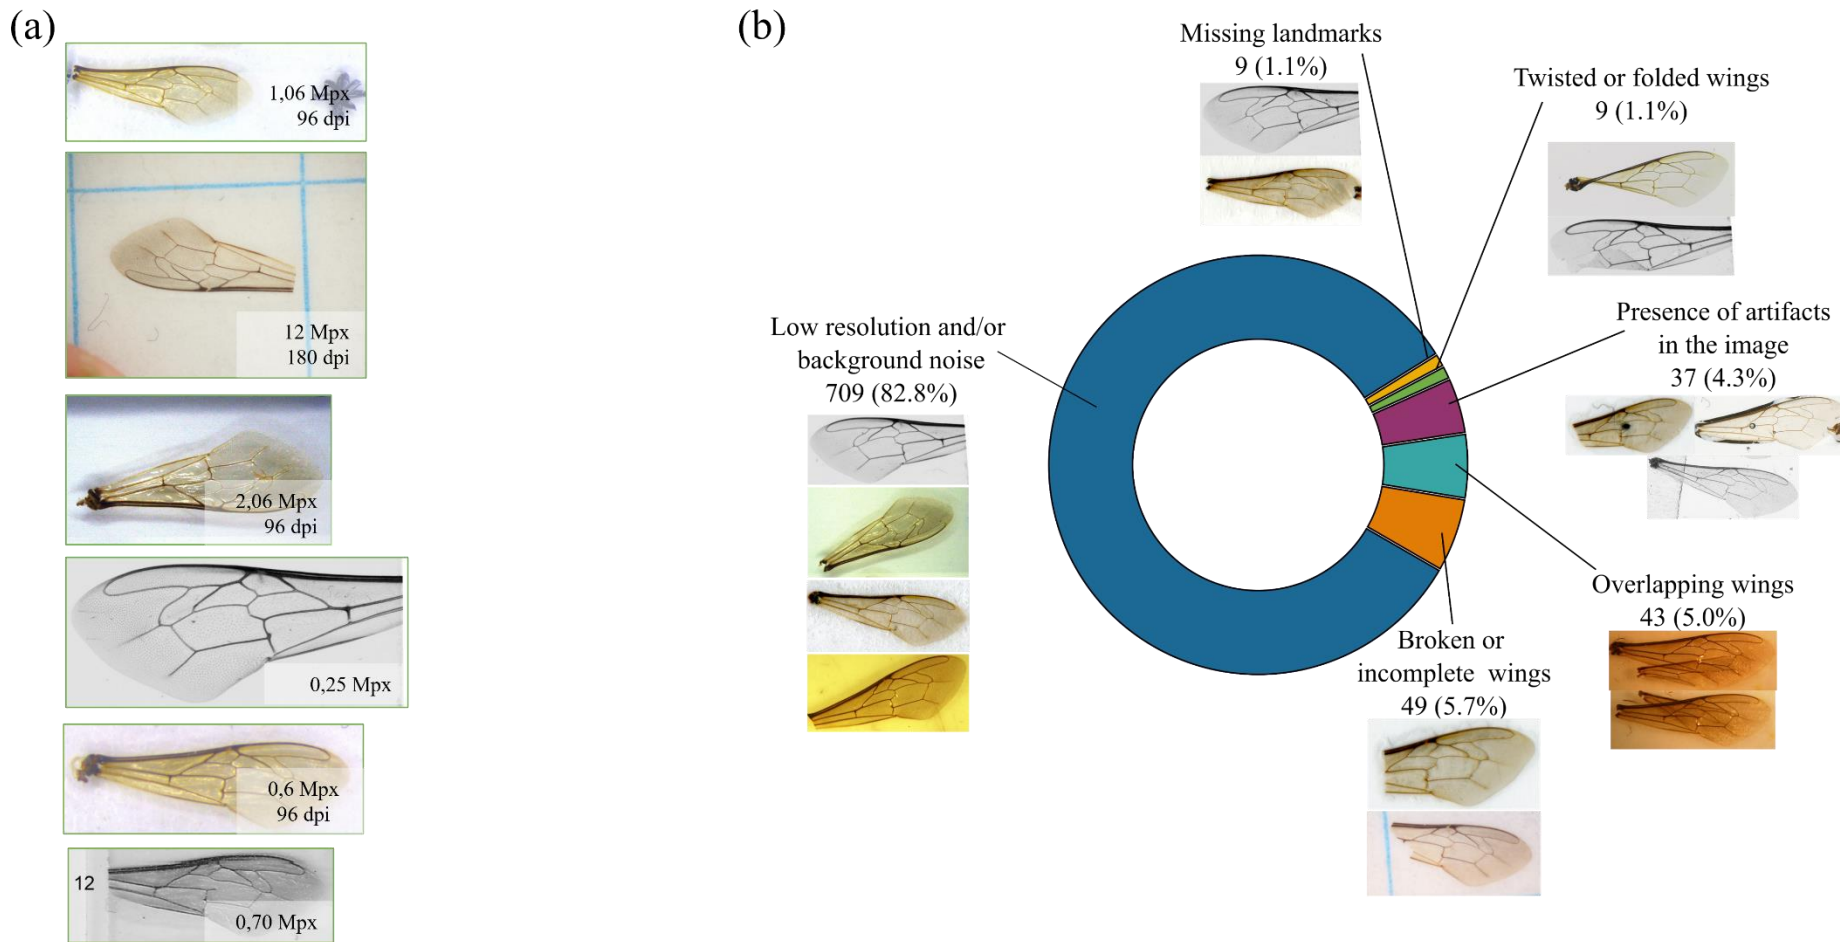

**Figure S1.** Accepted and rejected wing images by DeepWings©. (a) Examples of accepted images along with quality parameters. (b) Examples of rejected images. The donut chart represents the percentage of corrupted images distributed across the different classes.

## References

1. Chávez-Galarza, J.; Henriques, D.; Johnston, J.S.; Azevedo, J.C.; Patton, J.C.; Muñoz, I.; De la Rúa, P.; Pinto, M.A. Signatures of selection in the Iberian honey bee (*Apis mellifera iberiensis*) revealed by a genome scan analysis of single nucleotide polymorphisms. *Mol. Ecol.* **2013**, *22*, 5890–5907.
2. Chávez-Galarza, J.; Henriques, D.; Johnston, J.S.; Carneiro, M.; Rufino, J.; Patton, J.C.; Pinto, M.A. Revisiting the Iberian honey bee (*Apis mellifera iberiensis*) contact zone: maternal and genome-wide nuclear variations provide support for secondary contact from historical refugia. *Mol. Ecol.* **2015**, *24*, 2973–2992.
3. Ferreira, H.; Henriques, D.; Neves, C.J.; Machado, C.A.; Azevedo, J.C.; Franco, T.M.; Pinto, M.A. Historical and contemporaneous human-mediated processes left a strong genetic signature on honey bee populations from the Macaronesian archipelago of the Azores. *Apidologie* **2020**, *51*, 316–328.
4. Henriques, D.; Lopes, A.R.; Pinto, M.A. Centro de Investigação de Montanha-Instituto Politécnico de Bragança, Bragança, Portugal. *Manuscript in preparation*.
5. Henriques, D.; Lopes, A.R.; Chejanovsky, N.; Dalmon, A.; Higes, M.; Jabal-Uriel, C.; Le Conte, Y.; Reyes-Carreño, M.; Soroker, V.; Martín-Hernández, R. Mitochondrial and nuclear diversity of colonies of varying origins: contrasting patterns inferred from the intergenic tRNA<sup>Leu</sup>-cox2 region and immune SNPs. *J. Apic. Res.* **2021**, *61*, 305–308.
6. Garnery, L. *Rapport d'Expertise 2018. Analyses Génétiques de la Population d'Abeilles Mellifères de l'Île de Groix*; Laboratoires Evolution Génomes Comportement et Ecologie (Gif-sur-Yvette, France) 2018.
7. Browne, K.A.; Hassett, J.; Geary, M.; Moore, E.; Henriques, D.; Soland-Reckeweg, G.; Ferrari, R.; Mac Loughlin, E.; O'Brien, E.; O'Driscoll, S. Investigation of free-living honey bee colonies in Ireland. *J. Apic. Res.* **2020**, *60*, 229–240.
8. Ilyasov, R.A.; Lee, M.-L.; Yunusbaev, U.; Nikolenko, A.; Kwon, H.-W. Estimation of C-derived introgression into *A. m. mellifera* colonies in the Russian Urals using microsatellite genotyping. *Genes Genom.* **2020**, *42*, 987–996.
9. Puškadija, Z.; Kovačić, M.; Raguž, N.; Lukić, B.; Prešern, J.; Tofilski, A. Morphological diversity of Carniolan honey bee (*Apis mellifera carnica*) in Croatia and Slovenia. *J. Apic. Res.* **2020**, *60*, 326–336.
10. Tofilski, A.; Căuia, E.; Siceanu, A.; Vișan, G.O.; Căuia, D. Historical Changes in Honey Bee Wing Venation in Romania. *Insects* **2021**, *12*, 542.
